# Supplementary material for: Crystal nucleation and growth in high-entropy alloys revealed by atomic electron tomography
Source: Research Square preprint supplement (doi:10.21203/rs.3.rs-6142193/v1), 2025-04-15
Supplement: Supplementary file 1 [file b0d7edeedecc6bded038bda3.docx]

**Extended Data Figures and Tables**


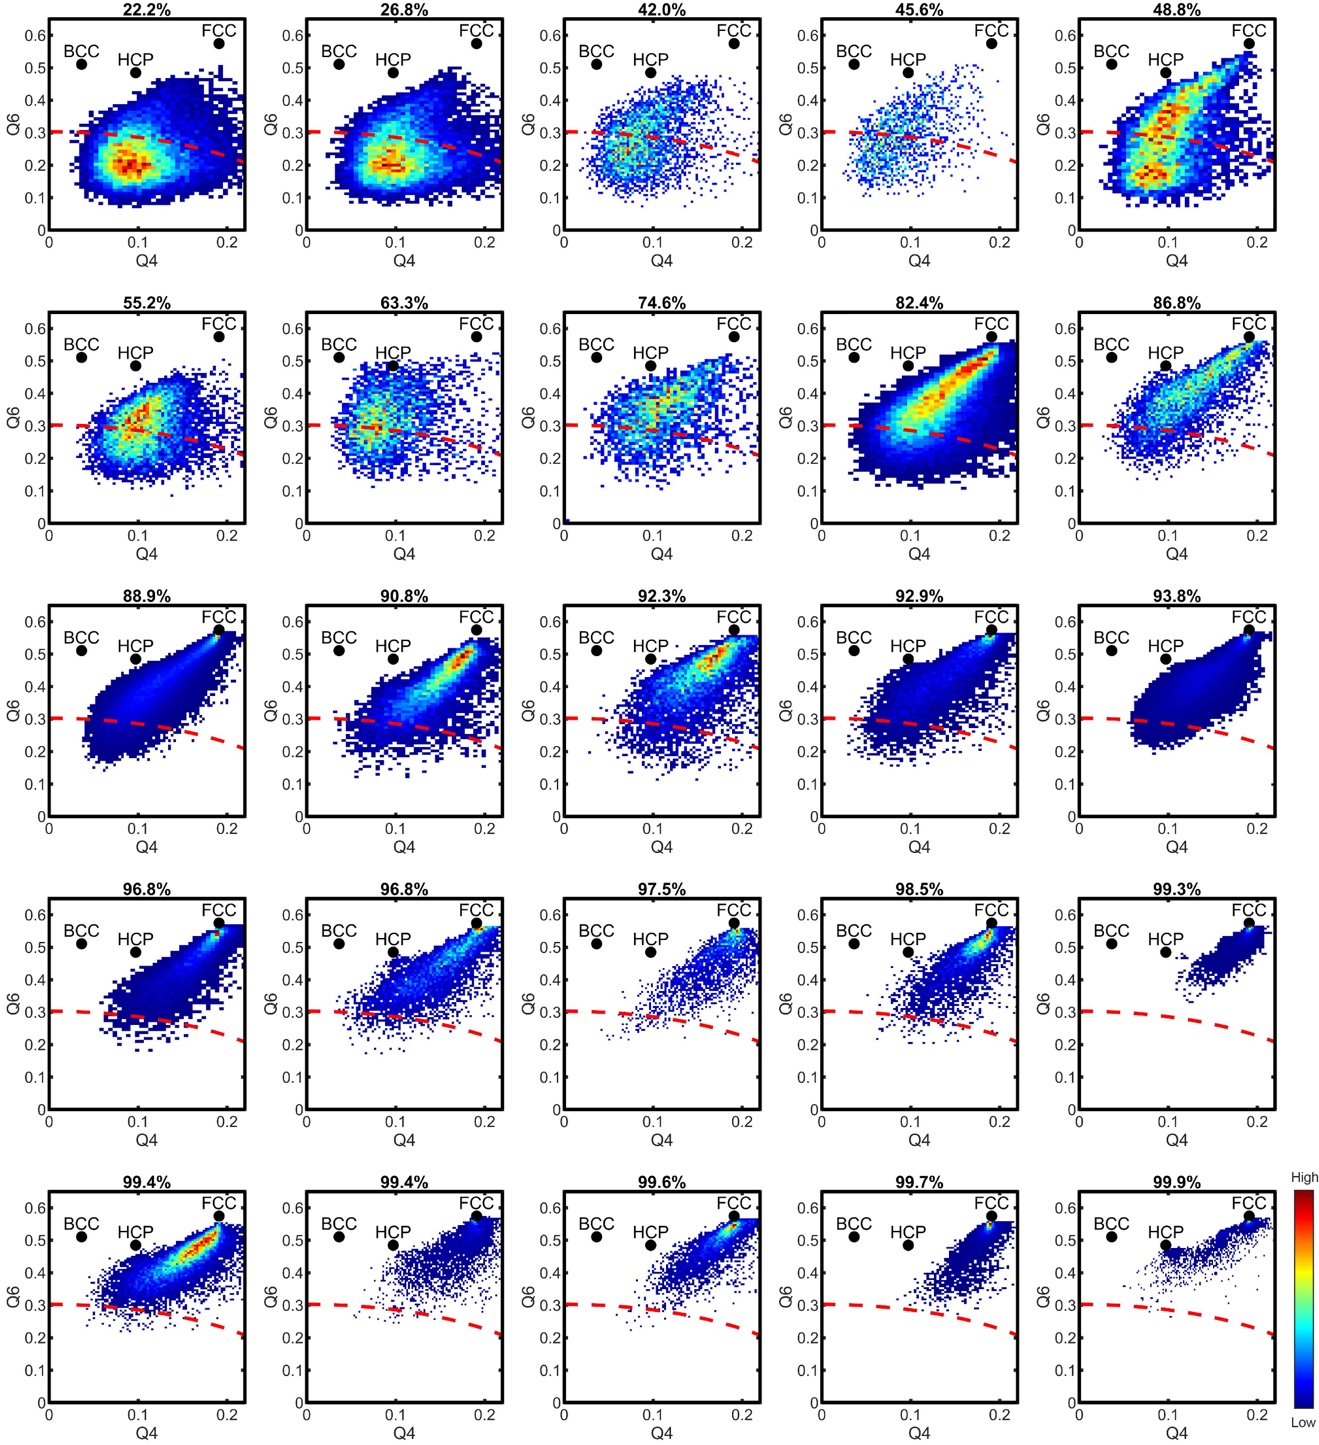


**Extended Data Fig. 1 |** **Histograms of the BOO parameters for HEA1-25**. The degree of crystallinity, defined as the percentage of atoms in each nanoparticle with BOO ≥ 0.5, gradually increases from 22.2% in HEA1 to 99.9% in HEA25. The red dashed curves mark the normalized BOO of 0.5.


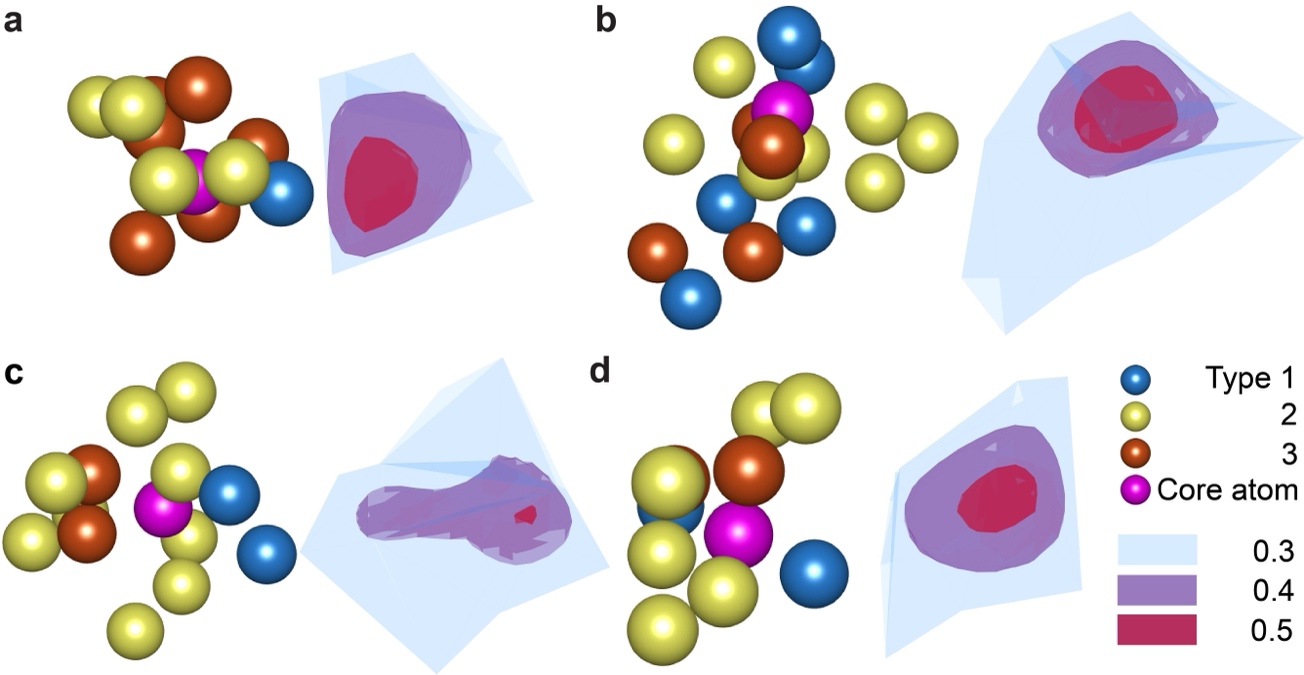


Extended Data Fig. 2 | Four representative smallest nuclei. a-d, Each nucleus consists of a core atom with BOO = 0.5, surrounded by atoms with BOO < 0.5. Iso-surface renderings illustrate BOO values of 0.3 (blue), 0.4 (purple), and 0.5 (red).


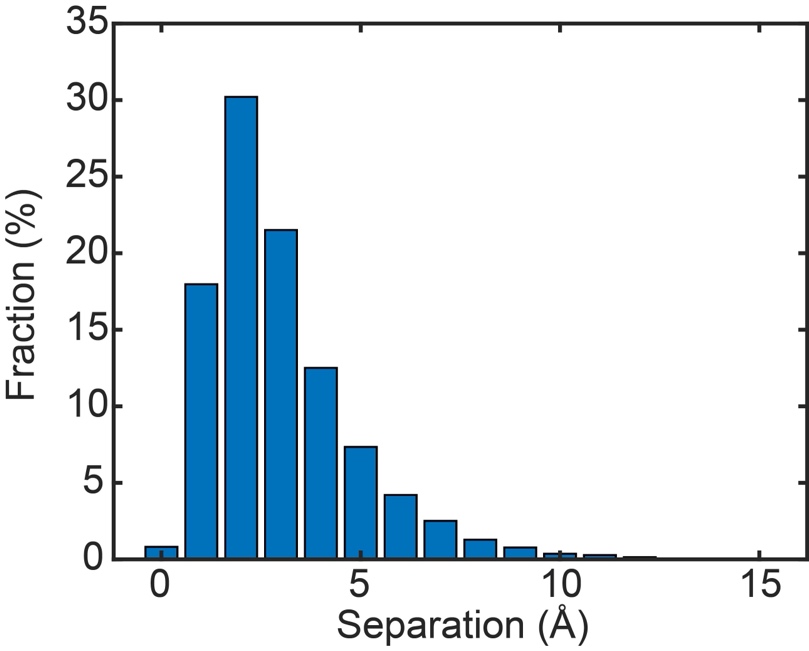


**Extended Data Fig. 3 |** **Histogram illustrating the separation between nuclei cores and their geometric centers.** While the cores are not necessarily located at the geometrical centers, the majority of nuclei (73.5%) have cores situated nearby, with separations less than the first nearest-neighbor atomic distance of 3.68 Å. Note that nuclei consisting of only a single atom with a BOO ≥ 0.5 were excluded from this analysis.


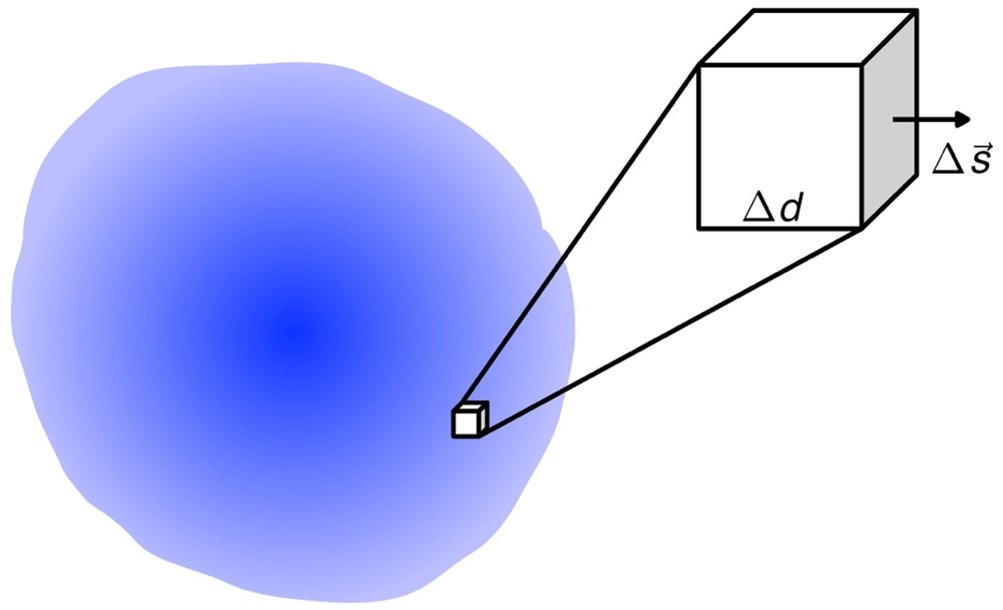


**Extended Data Fig. 4 |** **Schematic of a nucleus with varying order parameter values**. The nucleus is divided into many small volumes, each with an area *Δs* and a width *Δd*, for the calculation of the interfacial energy.

**
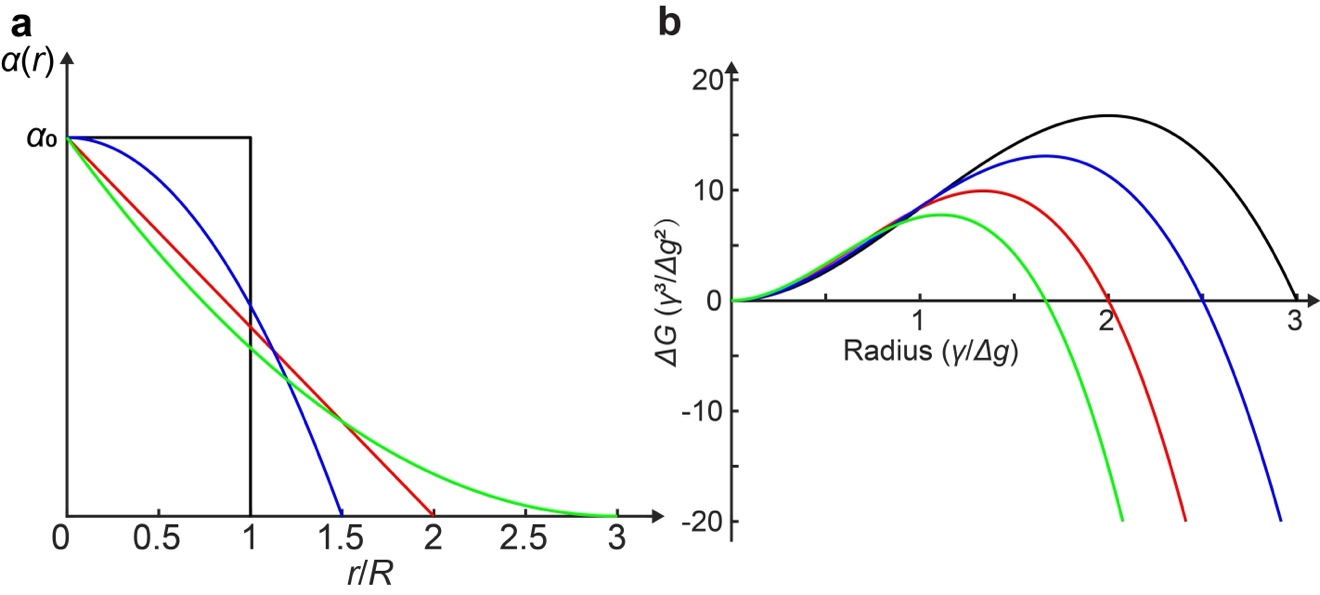
**

**Extended Data Fig. 5 |** **Schematic of the nucleation energy barrier in GNP. a**, Four specific cases of the order parameter distribution (*α*): the Heaviside step function (black), a linear function (red), and two parabolic functions (blue and green), where *α*0 is a constant. **b**, Total free energy change as a function of radial distance, calculated from the Heaviside step function (black), the linear function (red), and the two parabolic functions (blue and green) in (**a**) using GNP of Eq. (1). As the order parameter distribution in (**a**) extends further along the radial direction, the nucleation energy barrier increases gradually from the green to the red, blue, and black curves in (**b**).


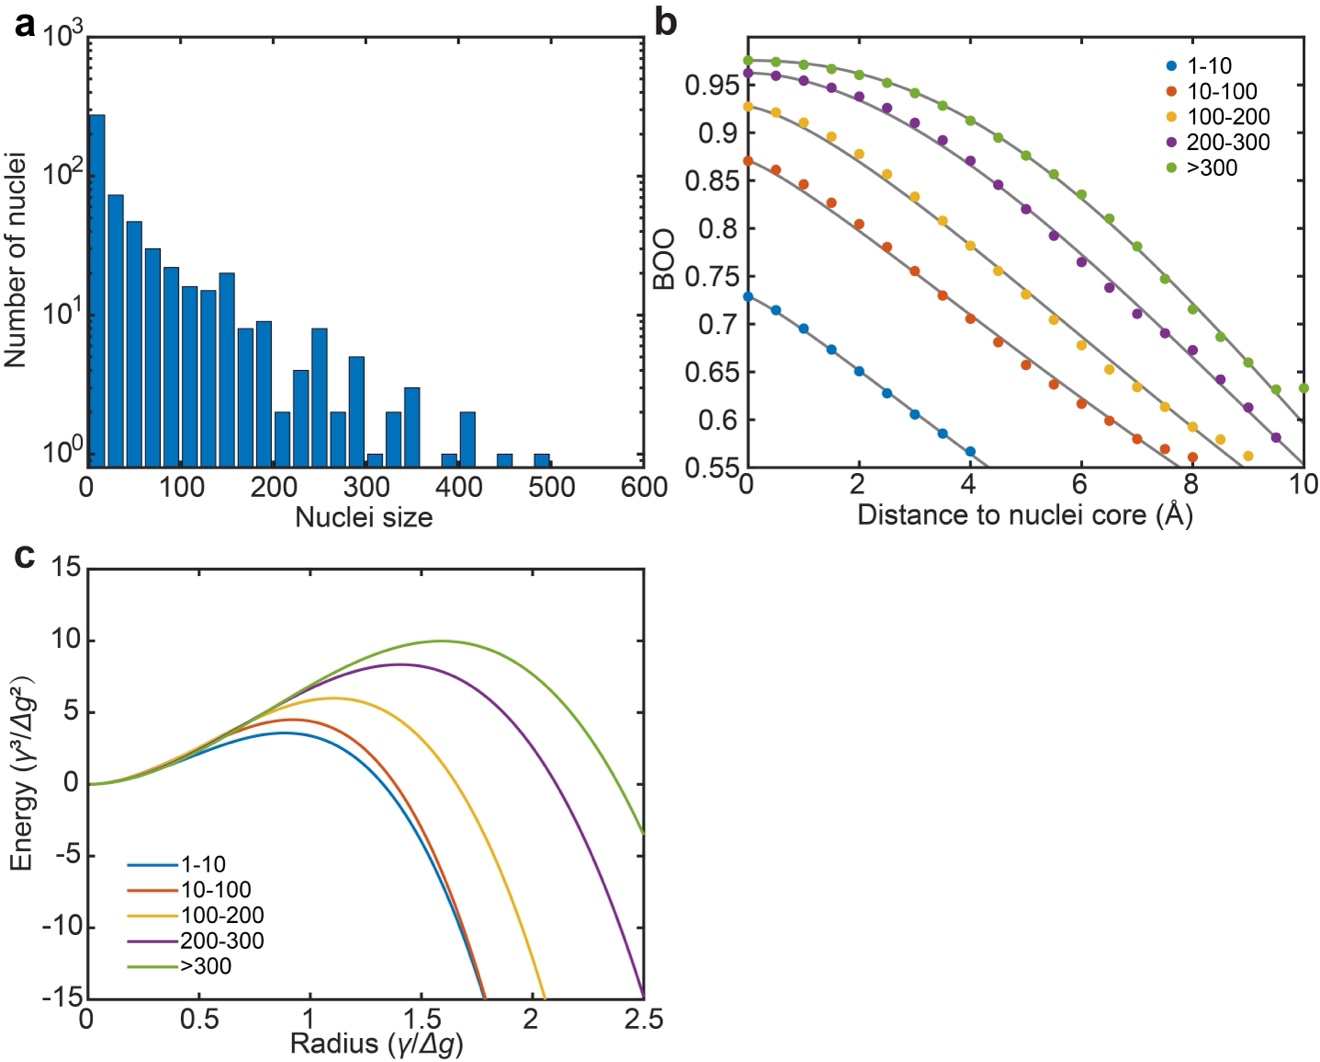


**Extended Data Fig. 6 | Analysis of 498 nuclei from six NiPdPt MEA nanoparticles**. **a**, Exponential decrease in the number of nuclei as their size increases. **b**, Radial average BOO distribution as a function of the distance to the nuclei core in five groups of varying nuclei sizes: <10 (blue dots), 10-100 (red dots), 100-200 (yellow dots), 200-300 (purple dots), and >300 (green dots). The solid curves represent fits to a generalized Gaussian distribution function. **c**, Total free energy change as a function of radial distance, calculated by incorporating the experimental data from (**b**) into Eq. (1), showing a gradual rise in the nucleation energy barrier.

**
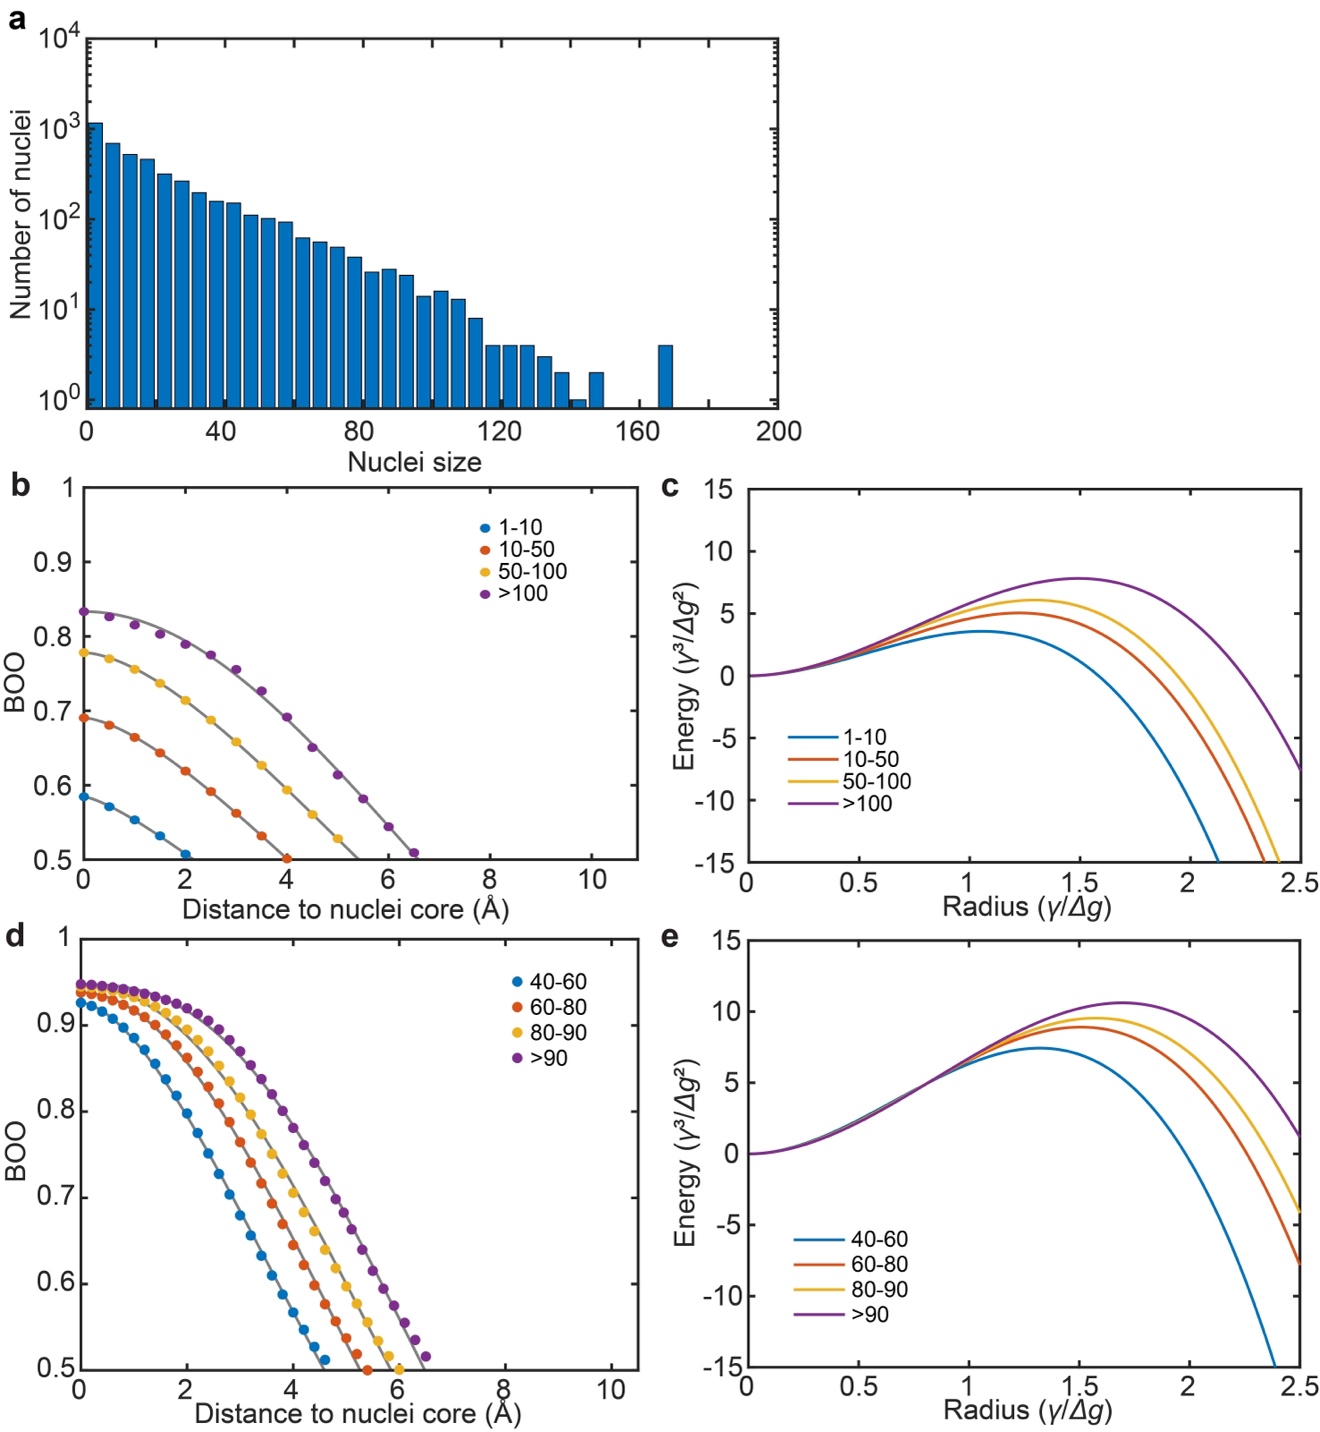
**

**Extended Data Fig. 7 | AIMD simulations capturing the process of crystal nucleation in HEAs during cooling from 2300 K to 300 K. a**,An exponential decrease in the number of nuclei is observed as a function of their size. **b**, Radial average BOO distribution plotted against the distance from the nuclei core, categorized into four groups based on nuclei size, with solid curves representing fits to a generalized Gaussian distribution function. **c**, Total free energy change as a function of radial distance, derived by applying the AIMD-simulated data from (**b**) into Eq. (1). **d**, Radial average BOO distribution, tracking the nucleus growth as temperature decreases from 1,300 K to 700 K. **e**, Total free energy variation as a function of radial distance from the nucleus, derived by applying the AIMD-simulated data from (**d**) into Eq. (1).


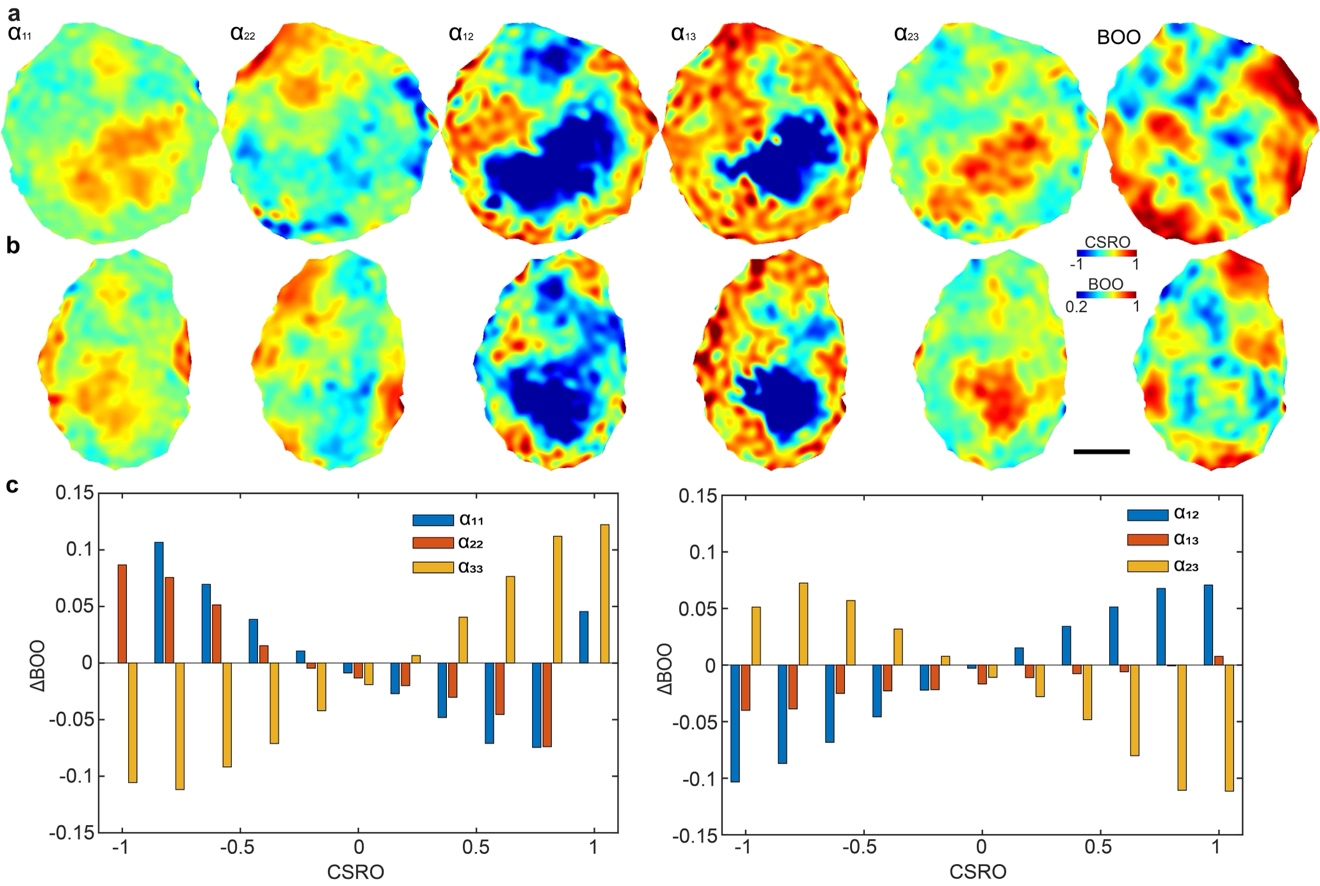


**Extended Data Fig. 8 | Correlation between nucleation and local chemical order in HEAs**. **a**, **b**, Representative slices in the XY (**a**) and XZ (**b**) planes, showing the distribution of five CSRO parameters (,, ,, ) and BOO in HEA10. The other CSRO parameter () is displayed in Fig. 3. **c**, Relationship between BOO and six CSRO parameters, obtained by averaging the 25 HEA nanoparticles. Scale bar, 2 nm.


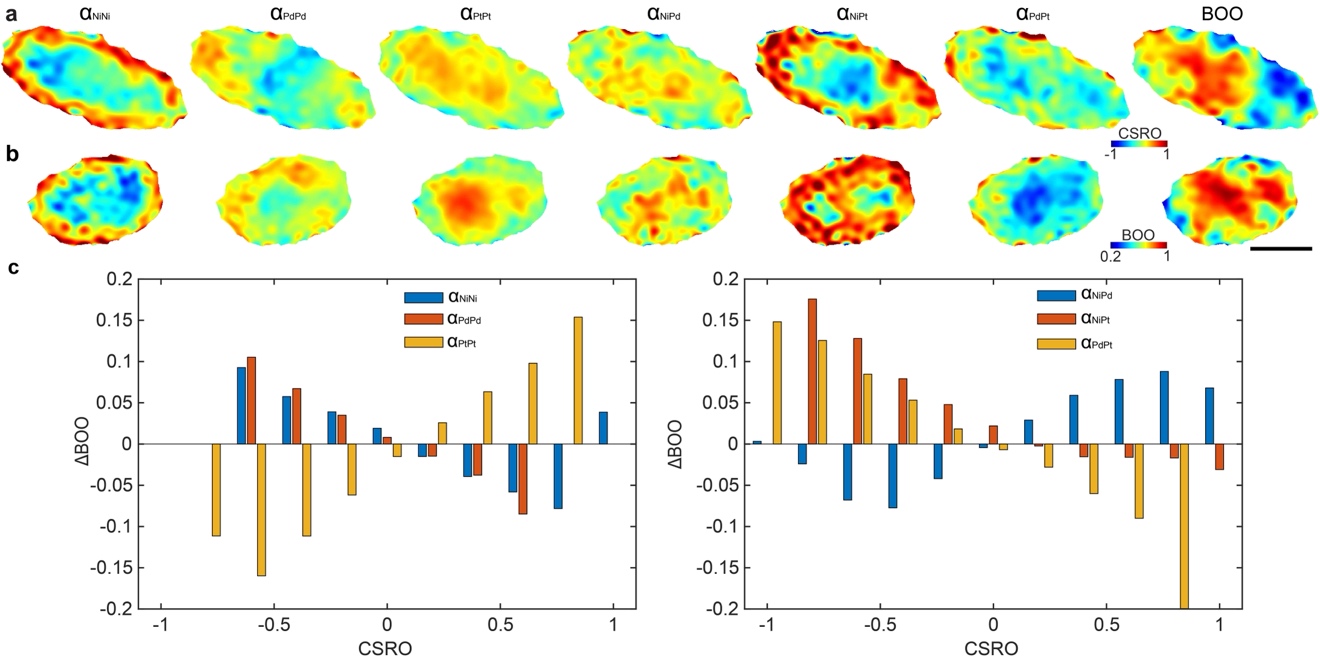


**Extended Data Fig. 9 | Correlation between nucleation and local chemical order in NiPdPt MEAs**. **a**, **b**, Representative slices in the XY (**a**) and XZ (**b**) planes show the distribution of six CSRO parameters (, , , , , ) and BOO in an MEA nanoparticle. **c**, Relationship between BOO and the six CSRO parameters, obtained by averaging the six MEA nanoparticles. Scale bar, 2 nm

**Extended Data Table 1 |** **AET data collection, processing, reconstruction, refinement, and statistics of the 25 HEA nanoparticles.**

|  | HEA1 | HEA2 | HEA3 | HEA4 | HEA5 | HEA6 | HEA7 | HEA8 | HEA9 | HEA10 |
| --- | --- | --- | --- | --- | --- | --- | --- | --- | --- | --- |
| **Data collection and processing** |  |  |  |  |  |  |  |  |  |  |
| Voltage (kV) | 200 | 200 | 200 | 200 | 200 | 200 | 200 | 200 | 200 | 200 |
| Convergence semi-angle (mrad) | 25 | 25 | 25 | 25 | 25 | 25 | 25 | 25 | 25 | 25 |
| Probe size (Å) | 0.8 | 0.8 | 0.8 | 0.8 | 0.8 | 0.8 | 0.8 | 0.8 | 0.8 | 0.8 |
| Detector inner angle (mrad) | 38 | 38 | 38 | 38 | 38 | 38 | 38 | 38 | 38 | 38 |
| Detector outer angle (mrad) | 190 | 190 | 190 | 190 | 190 | 190 | 190 | 190 | 190 | 190 |
| Depth of focus (nm) | 8 | 8 | 8 | 8 | 8 | 8 | 8 | 8 | 8 | 8 |
| Pixel size (Å) | 0.347 | 0.347 | 0.347 | 0.347 | 0.347 | 0.347 | 0.347 | 0.347 | 0.347 | 0.347 |
| # of images | 55 | 54 | 50 | 51 | 52 | 46 | 54 | 54 | 55 | 54 |
| # of frames/angle | 4 | 4 | 3 | 3 | 3 | 3 | 3 | 3 | 4 | 3 |
| Tilt range (°) | -69.4 | -74.7 | -65.1 | -69.3 | -67.1 | -58.7 | -71.7 | -72.5 | -69.2 | -67.9 |
|  | +72.6 | +63.6 | +71.5 | +63.4 | +69.2 | +74.9 | +69.4 | +63.4 | +72.1 | +70.7 |
| Total electron dose (105 e/Å2) | 9.5 | 9.3 | 7.0 | 7.1 | 7.3 | 6.4 | 7.6 | 7.6 | 10.2 | 7.5 |
| **Reconstruction** |  |  |  |  |  |  |  |  |  |  |
| Algorithm | RESIRE | RESIRE | RESIRE | RESIRE | RESIRE | RESIRE | RESIRE | RESIRE | RESIRE | RESIRE |
| Oversampling ratio | 4 | 4 | 4 | 4 | 4 | 4 | 4 | 4 | 4 | 4 |
| Number of iterations | 200 | 200 | 200 | 200 | 200 | 200 | 200 | 200 | 200 | 200 |
| **Refinement** |  |  |  |  |  |  |  |  |  |  |
| R1 (%)a | 9.54 | 9.97 | 9.87 | 12.32 | 10.69 | 9.58 | 10.90 | 11.57 | 7.44 | 8.49 |
| R (%)b | 6.45 | 5.84 | 7.06 | 9.87 | 7.76 | 6.41 | 7.68 | 8.98 | 4.12 | 6.26 |
| B’ factors (Å2) |  |  |  |  |  |  |  |  |  |  |
| Type 1 | 48.9 | 53.0 | 56.7 | 55.4 | 55.2 | 55.7 | 44.0 | 48.4 | 47.1 | 43.0 |
| Type 2 | 46.4 | 54.6 | 56.6 | 47.3 | 46.3 | 54.4 | 44.0 | 44.3 | 53.8 | 49.7 |
| Type 3 | 52.3 | 59.9 | 54.0 | 37.4 | 43.0 | 57.0 | 40.9 | 39.6 | 38.1 | 38.4 |
| **Statistics**  # of atoms |  |  |  |  |  |  |  |  |  |  |
| Total | 18356 | 18483 | 4640 | 2063 | 9755 | 11055 | 4661 | 3447 | 31235 | 8065 |
| Type 1 | 8322 | 7467 | 1339 | 648 | 3901 | 4206 | 1079 | 1116 | 8017 | 1962 |
| Type 2 | 6896 | 6936 | 1865 | 937 | 4213 | 4490 | 1906 | 1327 | 13389 | 3180 |
| Type 3 | 3138 | 4080 | 1436 | 478 | 1641 | 2359 | 1676 | 1004 | 9829 | 2923 |

**Extended Data Table 1 | (continued)**

|  | HEA11 | HEA12 | HEA13 | HEA14 | HEA15 | HEA16 | HEA17 | HEA18 | HEA19 | HEA20 |
| --- | --- | --- | --- | --- | --- | --- | --- | --- | --- | --- |
| **Data collection and processing** |  |  |  |  |  |  |  |  |  |  |
| Voltage (kV) | 300 | 200 | 200 | 200 | 300 | 200 | 200 | 200 | 200 | 200 |
| Convergence semi-angle (mrad) | 17 | 25 | 25 | 25 | 17 | 25 | 25 | 25 | 25 | 25 |
| Probe size (Å) | 0.7 | 0.8 | 0.8 | 0.8 | 0.7 | 0.8 | 0.8 | 0.8 | 0.8 | 0.8 |
| Detector inner angle (mrad) | 30 | 38 | 38 | 38 | 30 | 38 | 38 | 38 | 38 | 38 |
| Detector outer angle (mrad) | 195 | 190 | 190 | 190 | 195 | 190 | 190 | 190 | 190 | 190 |
| Depth of focus (nm) | 14 | 8 | 8 | 8 | 14 | 8 | 8 | 8 | 8 | 8 |
| Pixel size (Å) | 0.469 | 0.347 | 0.347 | 0.347 | 0.469 | 0.347 | 0.347 | 0.347 | 0.347 | 0.347 |
| # of images | 52 | 52 | 54 | 56 | 53 | 51 | 53 | 51 | 53 | 59 |
| # of frames/angle | 4 | 3 | 3 | 3 | 3 | 3 | 3 | 4 | 3 | 3 |
| Tilt range (°) | -72.6 | -70.3 | -69.6 | -69.6 | -72.6 | -69.1 | -69.6 | -69.3 | -71.7 | -66.6 |
|  | +67.4 | +66.3 | +74.0 | +71.8 | +66.4 | +64.7 | +74.0 | +63.4 | +69.4 | +78.0 |
| Total electron dose (105 e/Å2) | 3.4 | 7.2 | 7.6 | 7.8 | 3.5 | 7.1 | 7.4 | 9.5 | 7.4 | 8.2 |
| **Reconstruction** |  |  |  |  |  |  |  |  |  |  |
| Algorithm | RESIRE | RESIRE | RESIRE | RESIRE | RESIRE | RESIRE | RESIRE | RESIRE | RESIRE | RESIRE |
| Oversampling ratio | 4 | 4 | 4 | 4 | 4 | 4 | 4 | 4 | 4 | 4 |
| Number of iterations | 200 | 200 | 200 | 200 | 200 | 200 | 200 | 200 | 200 | 200 |
| **Refinement** |  |  |  |  |  |  |  |  |  |  |
| R1 (%)b | 7.43 | 13.02 | 8.46 | 7.61 | 6.81 | 11.79 | 9.38 | 9.95 | 7.62 | 6.10 |
| R (%)c | 4.39 | 11.19 | 5.89 | 5.10 | 3.95 | 8.77 | 7.46 | 6.48 | 5.66 | 3.16 |
| B’ factors (Å2) |  |  |  |  |  |  |  |  |  |  |
| Type 1 | 33.9 | 33.7 | 45.8 | 53.8 | 42.1 | 31.0 | 35.5 | 33.9 | 55.6 | 51.8 |
| Type 2 | 35.1 | 32.5 | 46.4 | 56.4 | 44.2 | 31.1 | 34.5 | 32.8 | 58.0 | 50.4 |
| Type 3 | 31.6 | 33.9 | 40.9 | 39.1 | 36.0 | 30.7 | 34.6 | 29.9 | 42.1 | 45.2 |
| **Statistics**  # of atoms |  |  |  |  |  |  |  |  |  |  |
| Total | 101881 | 11223 | 10053 | 12245 | 72680 | 12244 | 7739 | 3696 | 6648 | 28916 |
| Type 1 | 23644 | 4737 | 2638 | 2547 | 15748 | 5055 | 2158 | 872 | 1579 | 5846 |
| Type 2 | 46432 | 4206 | 3830 | 5264 | 32908 | 4639 | 2750 | 1735 | 2430 | 12227 |
| Type 3 | 31805 | 2280 | 3585 | 4434 | 24024 | 2550 | 2831 | 1089 | 2639 | 10843 |

**Extended Data Table 1 | (continued)**

|  | HEA21 | HEA22 | HEA23 | HEA24 | HEA25 |
| --- | --- | --- | --- | --- | --- |
| **Data collection and processing** |  |  |  |  |  |
| Voltage (kV) | 200 | 200 | 200 | 200 | 200 |
| Convergence semi-angle (mrad) | 25 | 25 | 25 | 25 | 25 |
| Probe size (Å) | 0.8 | 0.8 | 0.8 | 0.8 | 0.8 |
| Detector inner angle (mrad) | 38 | 38 | 38 | 38 | 38 |
| Detector outer angle (mrad) | 190 | 190 | 190 | 190 | 190 |
| Depth of focus (nm) | 8 | 8 | 8 | 8 | 8 |
| Pixel size (Å) | 0.347 | 0.347 | 0.347 | 0.347 | 0.347 |
| # of images | 53 | 56 | 56 | 53 | 52 |
| # of frames/angle | 4 | 3 | 3 | 3 | 3 |
| Tilt range (°) | -65.8 | -66.6 | -72.0 | -71.0 | -70.1 |
|  | +72.5 | +75.8 | +72.0 | +73.0 | 66.1 |
| Total electron dose (105 e/Å2) | 9.8 | 7.8 | 7.8 | 7.4 | 7.2 |
| **Reconstruction** |  |  |  |  |  |
| Algorithm | RESIRE | RESIRE | RESIRE | RESIRE | RESIRE |
| Oversampling ratio | 4 | 4 | 4 | 4 | 4 |
| Number of iterations | 200 | 200 | 200 | 200 | 200 |
| **Refinement** |  |  |  |  |  |
| *R*1 (%)b | 6.44 | 7.90 | 8.21 | 7.07 | 12.39 |
| *R* (%)c | 4.61 | 5.60 | 5.84 | 5.35 | 10.28 |
| B’ factors (Å2) |  |  |  |  |  |
| Type 1 | 38.1 | 41.6 | 35.5 | 40.9 | 24.6 |
| Type 2 | 37.9 | 37.6 | 34.5 | 39.5 | 25.5 |
| Type 3 | 36.1 | 36.3 | 34.6 | 39.8 | 29.2 |
| **Statistics**  # of atoms |  |  |  |  |  |
| Total | 21177 | 5672 | 6037 | 10232 | 4292 |
| Type 1 | 4865 | 1124 | 1446 | 3138 | 1903 |
| Type 2 | 8861 | 2356 | 2045 | 3898 | 1431 |
| Type 3 | 7451 | 2192 | 2546 | 3196 | 958 |

aThe *R*1-factor is defined as Eq. (5) in ref. 50.

bThe *R*-factor is defined in Eq. (4) in ref. 37.

Extended Data Table 2 | Parameters for fitting experimentally measured BOO data to a generalized Gaussian distribution function.

|  | Nuclei size* |  | *R* |  |
| --- | --- | --- | --- | --- |
| HEA | 1-10 | 0.63 | 9.8 | 1.27 |
| 10-100 | 0.79 | 13.1 | 1.29 |
| 100-500 | 0.89 | 14.9 | 1.33 |
| 500-1000 | 0.96 | 14.6 | 1.64 |
| >1000 | 0.98 | 13.5 | 2.66 |
| MEA | 1-10 | 0.73 | 12.6 | 1.19 |
| 10-100 | 0.87 | 14.7 | 1.22 |
| 100-200 | 0.93 | 14.2 | 1.40 |
| 200-300 | 0.96 | 13.9 | 1.81 |
| >300 | 0.98 | 13.8 | 2.20 |

*Each number indicates the number of atoms in each nucleus with BOO ≥ 0.5.
